# Supplementary material for: PTER is a N-acetyltaurine hydrolase that regulates feeding and obesity
Source: PubMed Central journal article supplement (PMC11374699; doi:10.1038/s41586-024-07801-6), 2024-08-07

## Supplementary information

---

# **PTER is a *N*-acetyltaurine hydrolase that regulates feeding and obesity**

---

In the format provided by the  
authors and unedited

**Fig. 1g**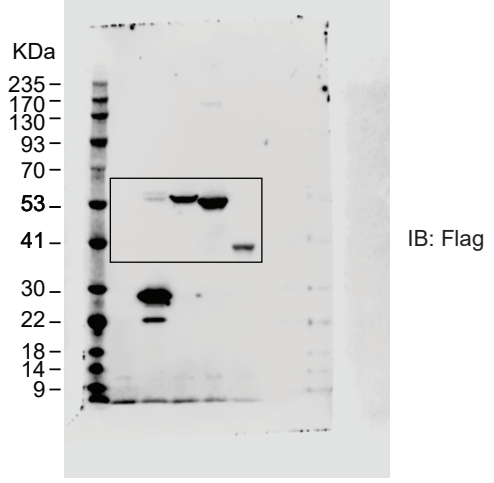**Fig. 1h**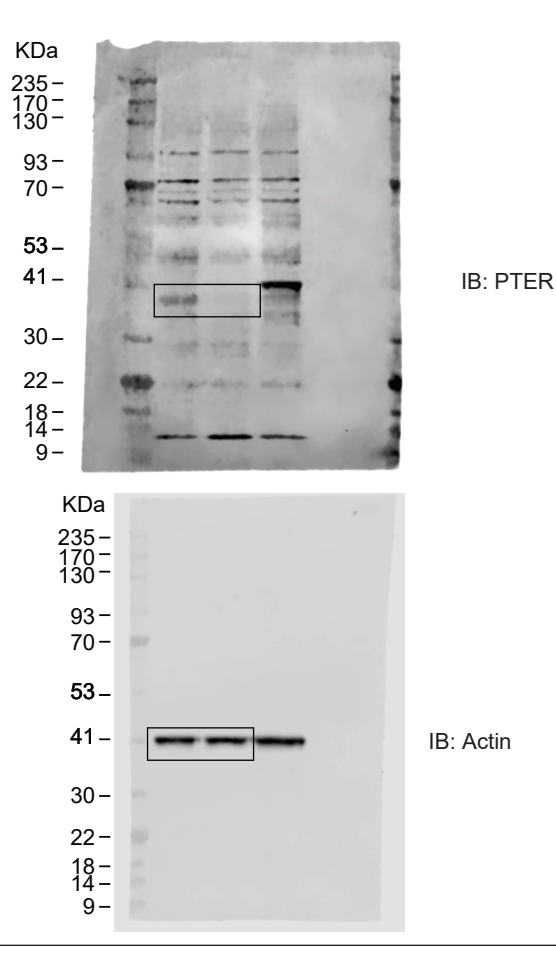**Fig. 2d**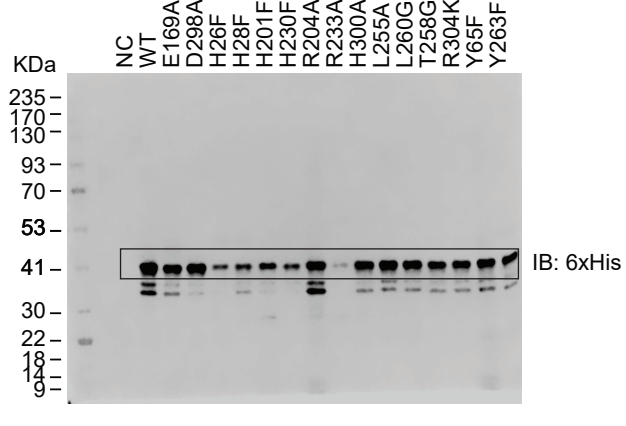**Fig. 3a**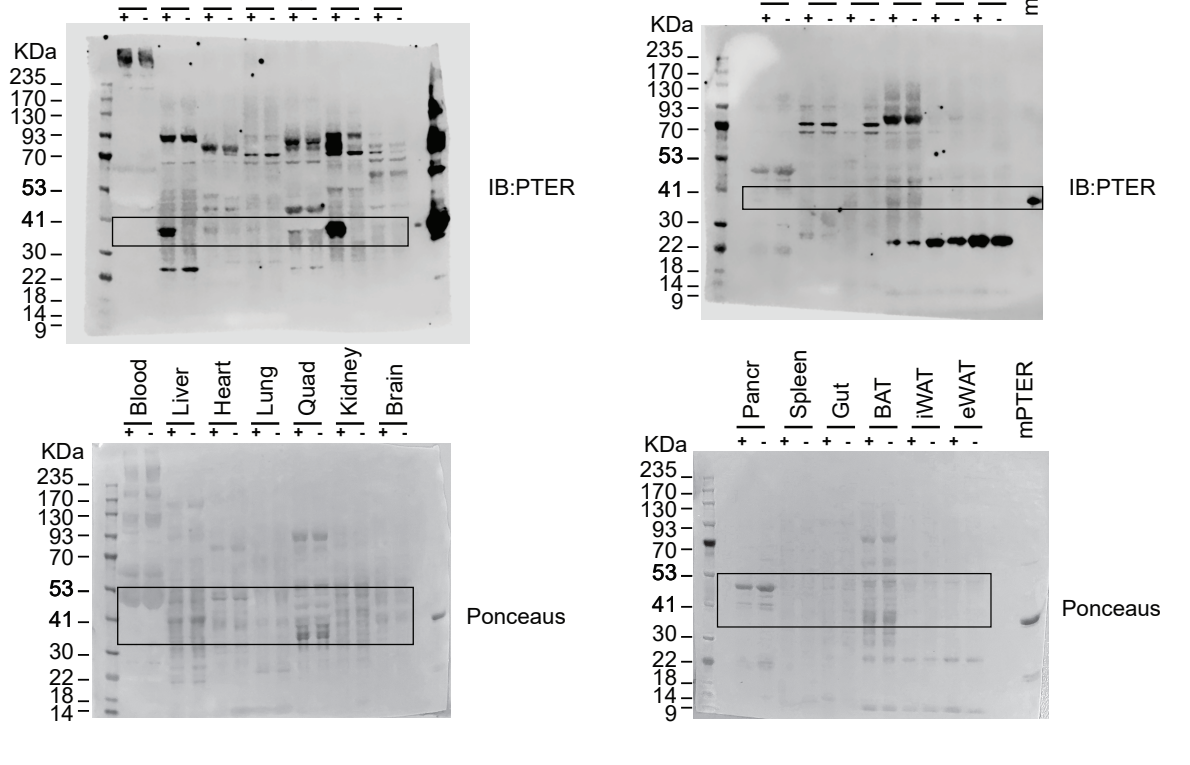**Fig. 5e**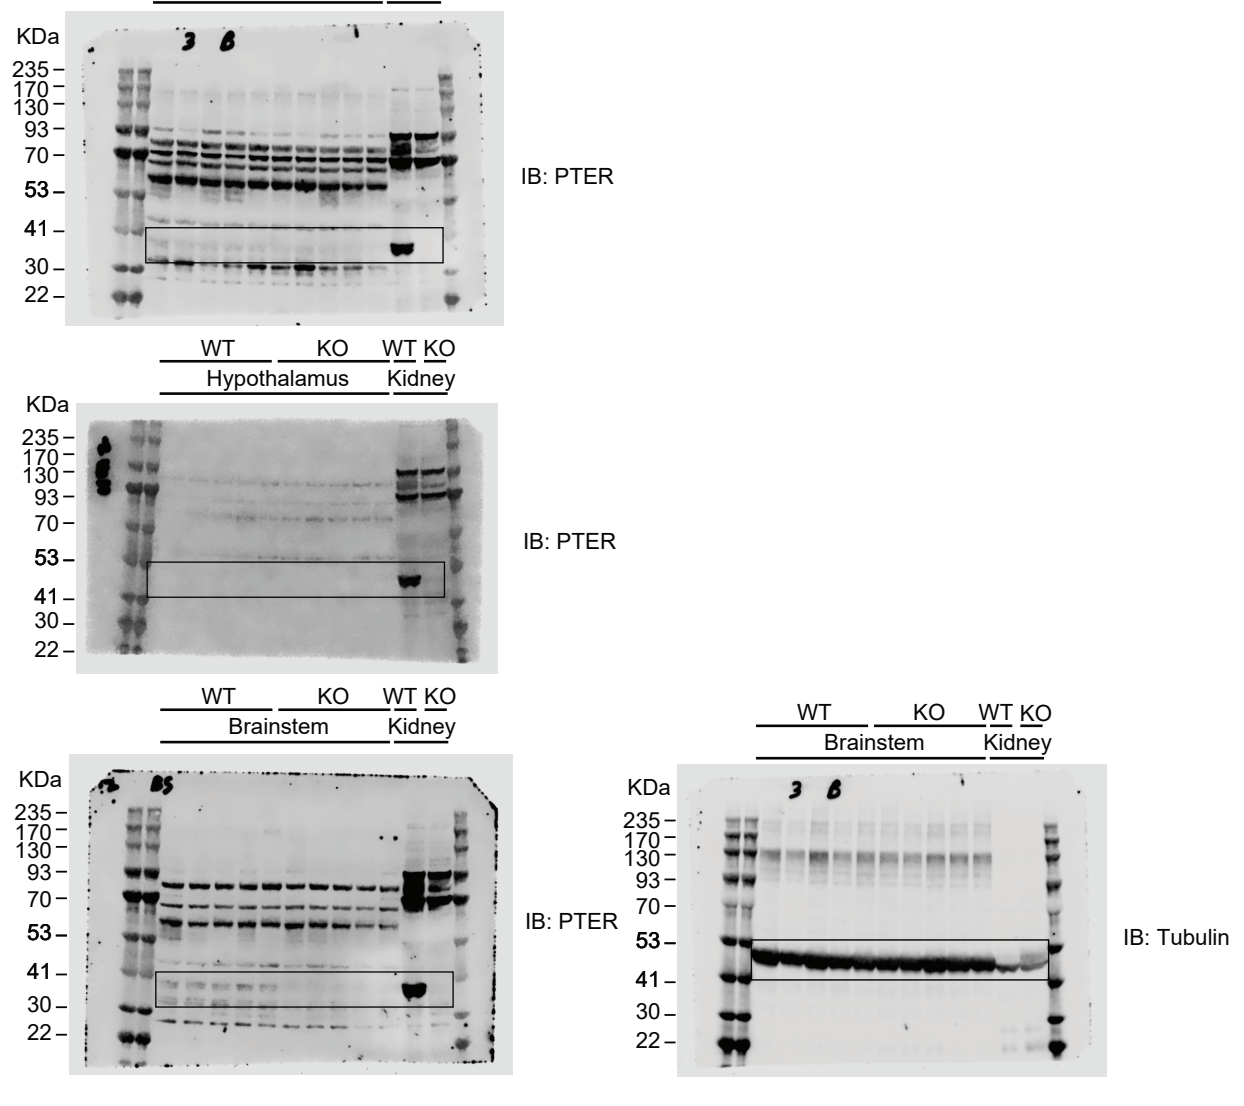**Extended Data Fig. S4c**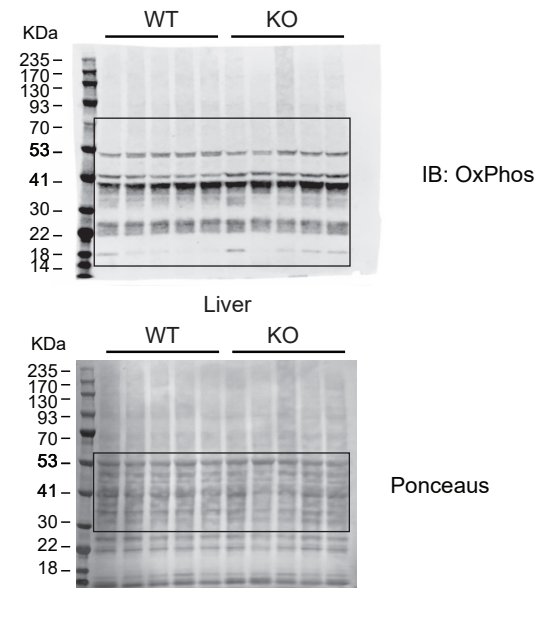**Extended Data Fig. S4d**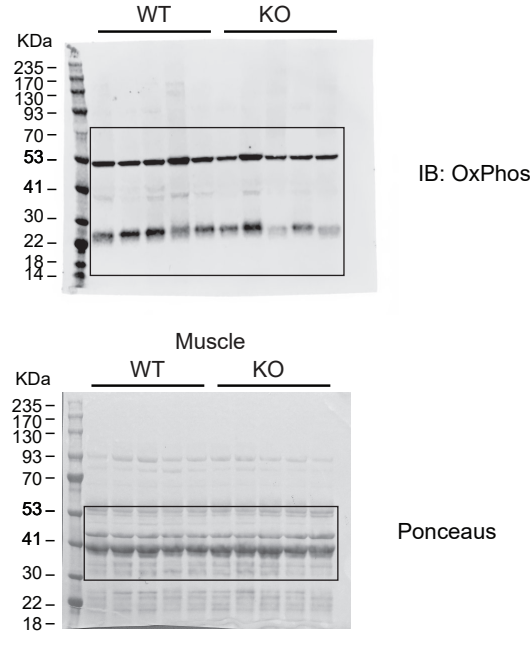**Extended Data Fig. S9I**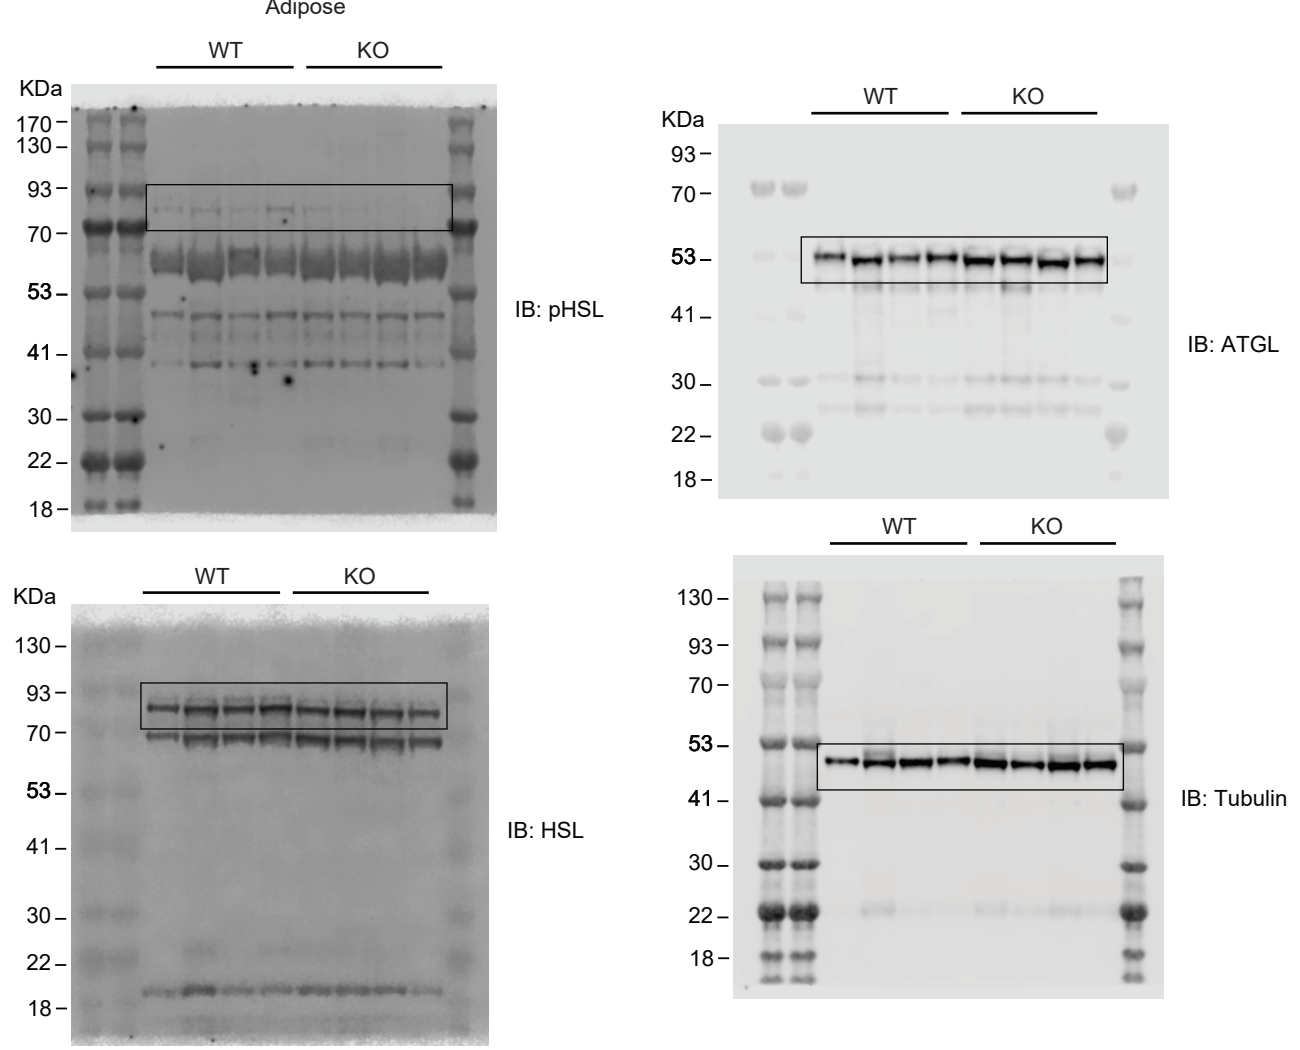

Supplement: 41586_2024_7801_MOESM1_ESM.pdf [file 41586_2024_7801_MOESM1_ESM.pdf]
